# Supplementary material
Source: MDPI journal article supplement (https://www.mdpi.com/1999-4907/12/5/577)
Supplement: s1 [file s1]

Archive with 6 entries (6 files):
- Supplemental Figure S1.pdf
- Supplemental Table S1.pdf
- Supplemental Table S2.pdf
- Supplemental Table S3.pdf
- Supplemental table S4.pdf
- Supplemental table S5.pdf
