# Supplementary material
Source: MDPI journal article supplement (https://www.mdpi.com/1999-4907/12/5/577)
Supplement: s1 [file s1 › Supplemental Table S1.pdf]

Supplemental Table S1. Intra- and inter-day repeatability for five compounds

| compounds         | intra-day (n=6) |         | Inter-day (n=3) |         |
|-------------------|-----------------|---------|-----------------|---------|
|                   | contents        | RSD (%) | contents        | RSD (%) |
| naringenin        | 1.89±0.021      | 1.56    | 1.88±0.015      | 0.76    |
| isoliquiritigenin | 0.57±0.048      | 0.83    | 0.56±0.026      | 1.15    |
| dalbergin         | 0.028±0.006     | 0.64    | 0.029±0.015     | 0.46    |
| formononetin      | 0.32±0.015      | 0.32    | 0.29±0.021      | 1.14    |
| trans-nerolidol   | 1.17±0.002      | 1.05    | 1.16±0.003      | 1.39    |
