# Supplementary material
Source: MDPI journal article supplement (https://www.mdpi.com/1999-4907/12/5/577)
Supplement: s1 [file s1 › Supplemental Table S2.pdf]

Supplemental Table S2. Recoveries of five compounds

| compounds         | added (μg) | detected(μg) | recovery(%) | R.S.D ( % ) |
|-------------------|------------|--------------|-------------|-------------|
| naringenin        | 14.4       | 13.42        | 93.19       | 2.58        |
|                   | 18         | 16.96        | 94.22       | 2.79        |
|                   | 21.6       | 20.53        | 95.05       | 1.72        |
| isoliquiritigenin | 36         | 36.26        | 100.72      | 1.68        |
|                   | 30         | 30.64        | 102.13      | 1.43        |
|                   | 24         | 23.87        | 99.46       | 1.37        |
| dalbergin         | 1.2        | 1.16         | 96.67       | 3.93        |
|                   | 1          | 1.01         | 101         | 4.51        |
|                   | 0.8        | 0.83         | 103.75      | 4.11        |
| formononetin      | 12         | 12.32        | 102.67      | 2.52        |
|                   | 10         | 9.86         | 98.6        | 2.81        |
|                   | 8          | 8.06         | 100.75      | 2.23        |
| trans-nerolidol   | 14.4       | 13.42        | 93.19       | 2.58        |
|                   | 18         | 16.96        | 94.22       | 2.79        |
|                   | 21.6       | 20.53        | 95.05       | 1.72        |
