# Supplementary material
Source: MDPI journal article supplement (https://www.mdpi.com/1999-4907/12/5/577)
Supplement: s1 [file s1 › Supplemental Table S3.pdf]

Supplemental Table S3 Stability of five compounds

| compounds         | contents    | RSD  |
|-------------------|-------------|------|
| naringenin        | 1.86±0.042  | 0.81 |
| isoliquiritigenin | 0.61±0.015  | 1.52 |
| dalbergin         | 0.027±0.006 | 1.33 |
| formononetin      | 0.3±0.022   | 0.98 |
| trans-nerolidol   | 1.21±0.056  | 2.34 |
