# Supplementary material
Source: MDPI journal article supplement (https://www.mdpi.com/1999-4907/12/5/577)
Supplement: s1 [file s1 › Supplemental table S4.pdf]

Supplemental table S4. Change of lignin extraction rate

| growth ring | extraction rate of lignin/% |
|-------------|-----------------------------|
| 1           | 8.7                         |
| 2           | 8.9                         |
| 3           | 9.2                         |
| 4X          | 9.1                         |
| 4B          | 8.7                         |
| 5           | 8.9                         |
| 6           | 8.2                         |
| 7           | 7.8                         |
| 8           | 8.1                         |
| 9           | 8.3                         |
| 10          | 8.1                         |
