# Supplementary material
Source: MDPI journal article supplement (https://www.mdpi.com/1999-4907/12/5/577)
Supplement: s1 [file s1 › Supplemental table S5.pdf]

Supplemental table S5 Element content of different growth ring in *Dalbergia odorifera*/mg·kg<sup>-1</sup>

| growth<br>ring | K       | Na     | Mg     | Ca       | Fe    | Cu   | Zn    | Sr   |
|----------------|---------|--------|--------|----------|-------|------|-------|------|
| 1              | 172.52  | 78.98  | 450.67 | 10035.72 | 79.58 | 4.06 | 13.89 | 4.62 |
| 2              | 195.66  | 84.55  | 400.22 | 10193.63 | 78.89 | 4.14 | 14.02 | 4.75 |
| 3              | 320.7   | 100.43 | 350.46 | 9034.77  | 78.4  | 4.09 | 13.98 | 4.09 |
| 4X             | 443.37  | 124.76 | 325.98 | 8339.5   | 72.18 | 4.05 | 13.87 | 3.82 |
| 4B             | 900.06  | 165.53 | 254.95 | 6135.87  | 68.26 | 4.11 | 13.94 | 3.39 |
| 5              | 1020.79 | 130.69 | 265.34 | 6045.23  | 63.55 | 4.18 | 14.6  | 3.14 |
| 6              | 1024.54 | 97.35  | 278.33 | 6073.47  | 62.76 | 4.06 | 14.83 | 3.18 |
| 7              | 1131.12 | 82.08  | 283.59 | 6035.93  | 62.59 | 4.03 | 14.75 | 3.07 |
| 8              | 1137.4  | 85.58  | 297.13 | 5981.44  | 61.3  | 4.15 | 15.85 | 2.96 |
| 9              | 1130.23 | 80.76  | 296.84 | 5757.21  | 59.68 | 4.05 | 15.9  | 2.81 |
| 10             | 1128.73 | 82.63  | 300.72 | 5832.14  | 58.43 | 3.85 | 15.57 | 3.04 |
