# Supplementary material
Source: MDPI journal article supplement (https://www.mdpi.com/1999-4907/12/5/577)

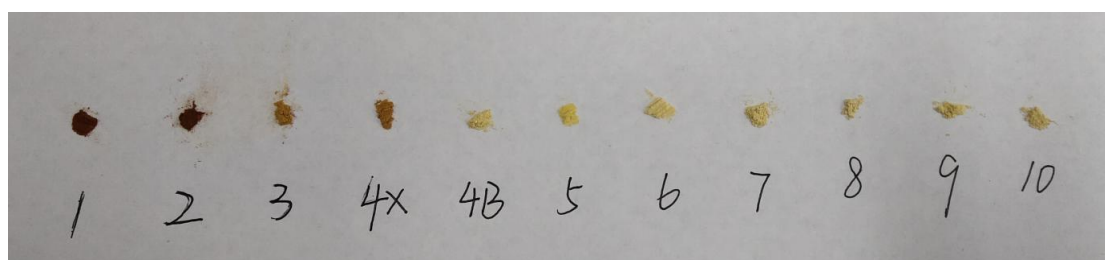

Supplemental Figure S1. The color change of extracted lignin

Supplement: s1 [file s1 › Supplemental Figure S1.pdf]
